# Supplementary material for: Development of Polyelectrolyte Complexes for the Delivery of Peptide-Based Subunit Vaccines against Group A Streptococcus
Source: MDPI journal article supplement (doi:10.3390/nano10050823), 2020-04-26
Supplement: s1 [file s1]

## Supporting information

# Development of polyelectrolyte complexes for the delivery of peptide-based subunit vaccines against group A streptococcus

Lili Zhao <sup>1</sup>, Wanli Jin <sup>1</sup>, Jazmina Gonzalez Cruz <sup>2</sup>, Nirmal Marasini <sup>1</sup>, Zeinab G. Khalil <sup>3</sup>, Robert J. Capon <sup>3</sup>, Waleed M. Hussein <sup>1,4</sup>, Mariusz Skwarczynski <sup>1\*</sup> and Istvan Toth <sup>1,3,5\*</sup>

<sup>1</sup> School of Chemistry & Molecular Biosciences, The University of Queensland, St Lucia, QLD 4072, Australia; lili.zhao@uq.edu.au (L.Z.); wanli.jin@uq.net.au (W.J.); nirmal.marasini@uq.net.au (N.M.); w.hussein@uq.edu.au (W.M.H.)

<sup>2</sup> Diamantina Institute, Translational Research Institute, The University of Queensland, Woolloongabba, QLD 4102, Australia; j.gonzalezcruz@uq.edu.au (J.G.C.)

<sup>3</sup> Institute for Molecular Bioscience, The University of Queensland, St. Lucia, QLD 4072, Australia; z.khalil@imb.uq.edu.au (Z.G.K.); r.capon@imb.uq.edu.au (R.J.C.)

<sup>4</sup> Pharmaceutical Organic Chemistry Department, Faculty of Pharmacy, Helwan University, Helwan, 11795, Egypt

<sup>5</sup> School of Pharmacy, The University of Queensland, Woolloongabba, QLD 4102, Australia

\* Correspondence: m.skwarczynski@uq.edu.au (M.S.); i.toth@uq.edu.au (I.T.)

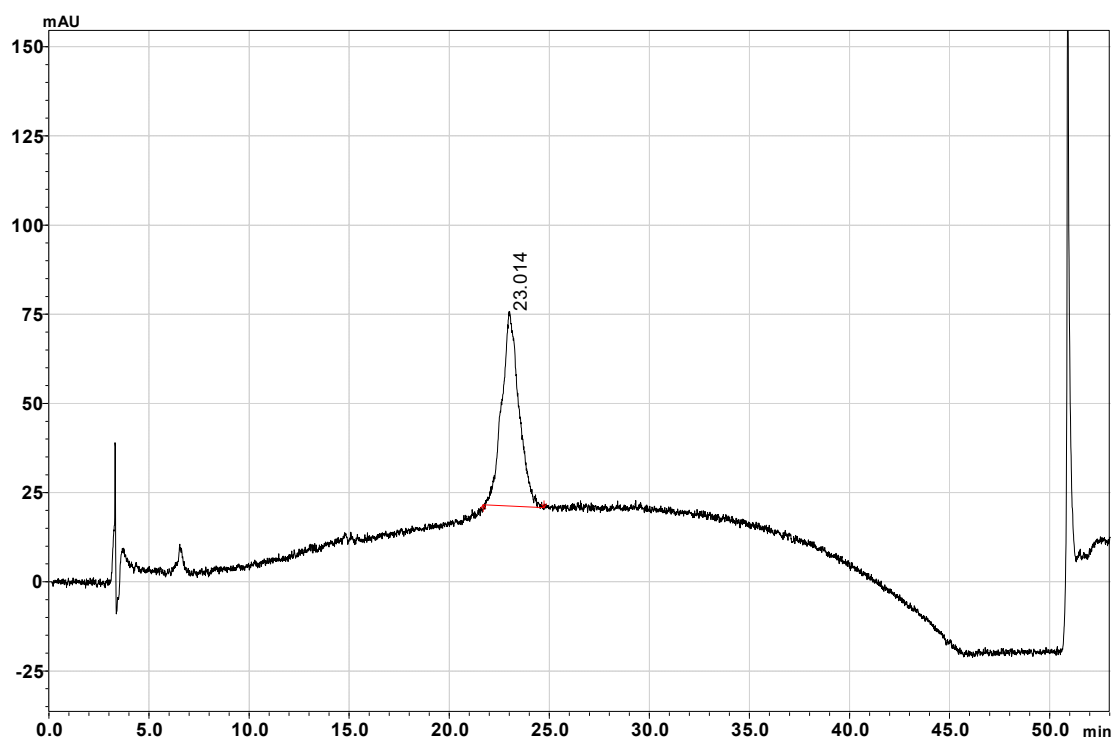

Figure S1. Analytical HPLC profile of LCP-1.  $t_R=23.0$  min

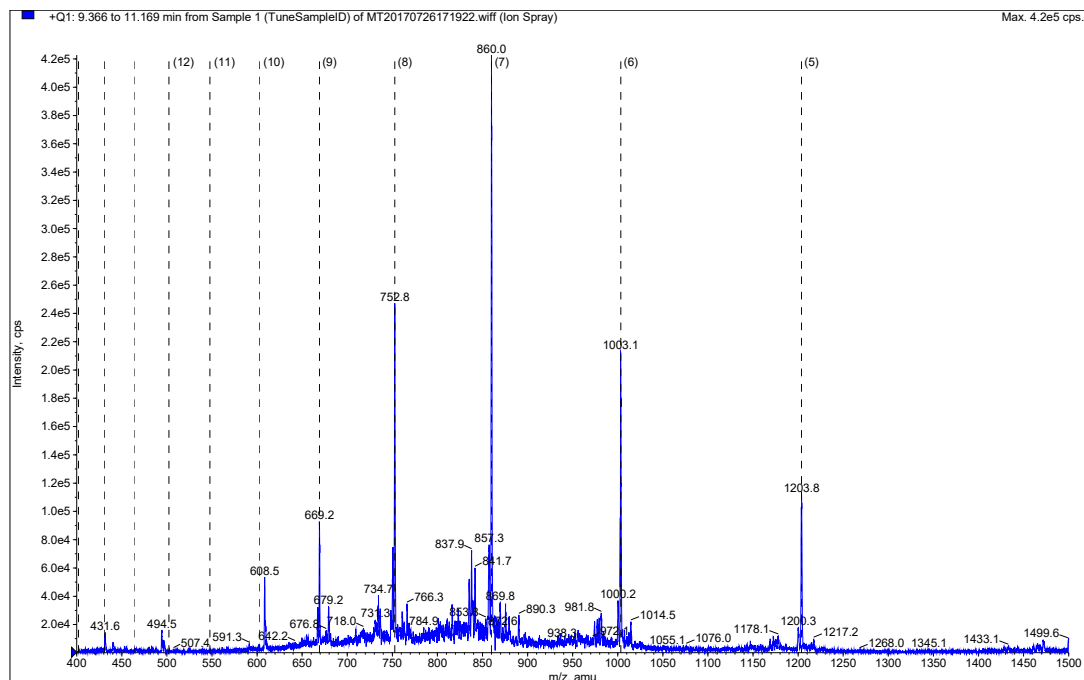

**Figure S2.** Mass spectrum of LCP-1. ESI-MS:  $m/z$  1203.8 (calculated 1203.8)  $[M+5H]^{5+}$ ; 1003.1 (calculated 1003.4)  $[M+6H]^{6+}$ ; 860.0 (calculated 860.2)  $[M+7H]^{7+}$ ; 752.8 (calculated 752.8)  $[M+8H]^{8+}$ ; 669.2 (calculated 669.2)  $[M+9H]^{9+}$

a)

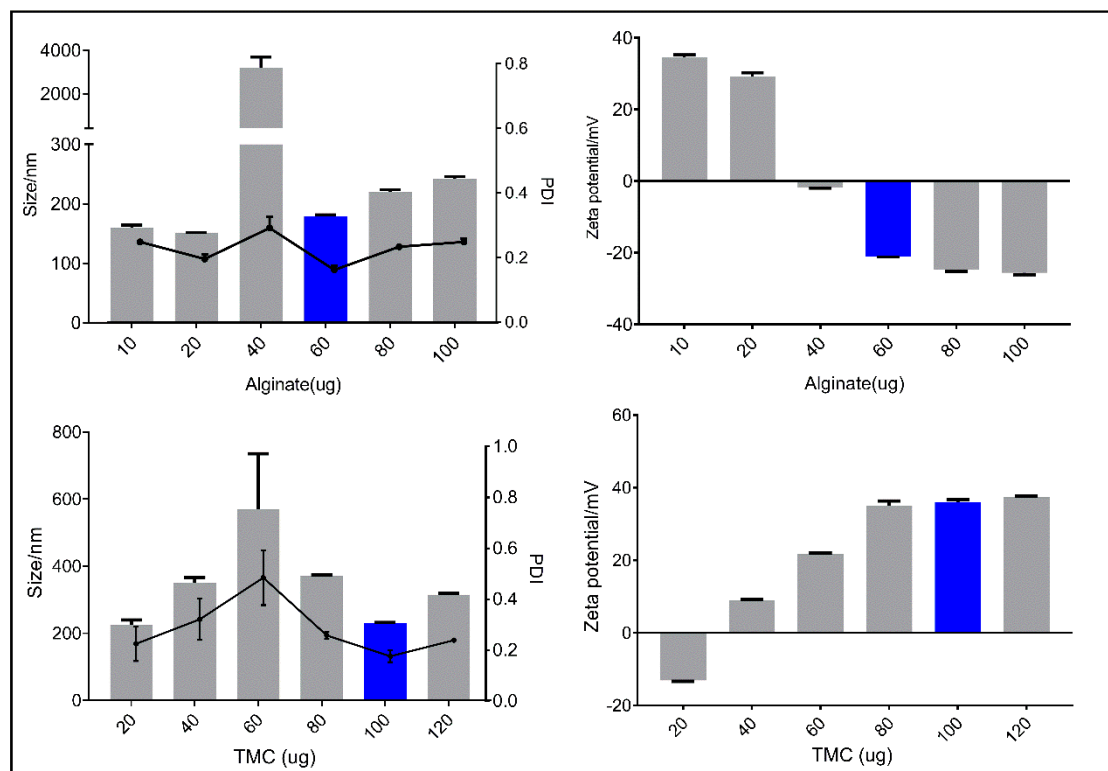

b)

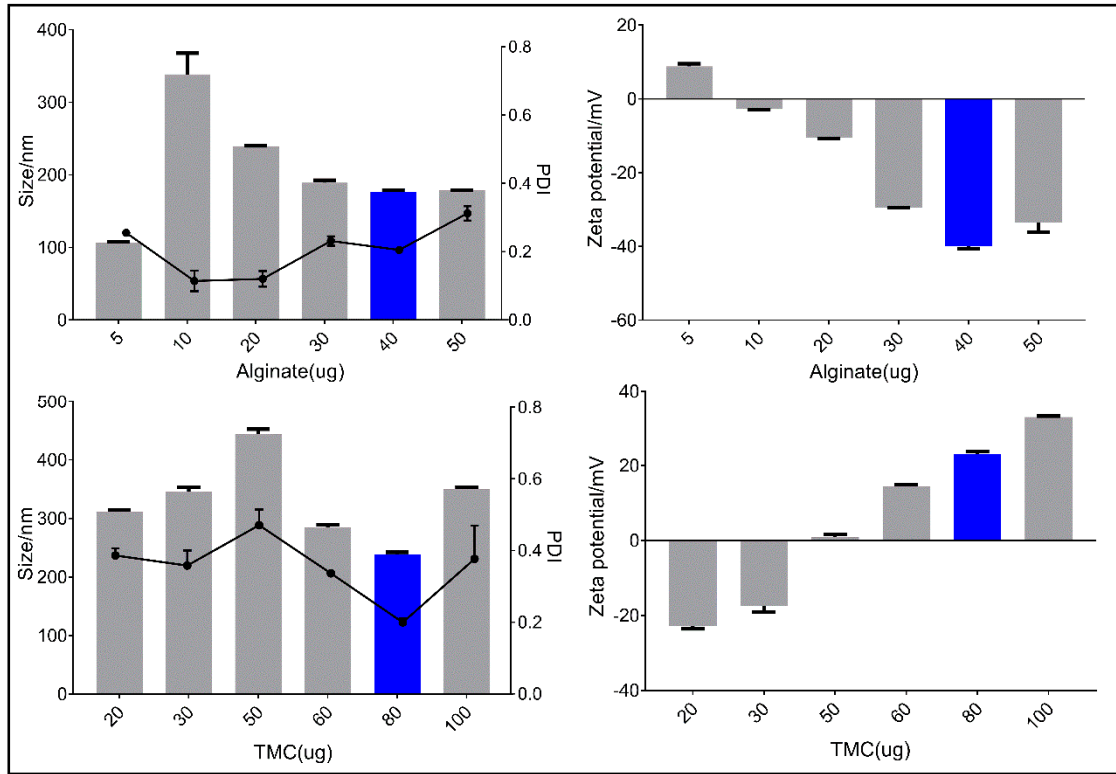

c)

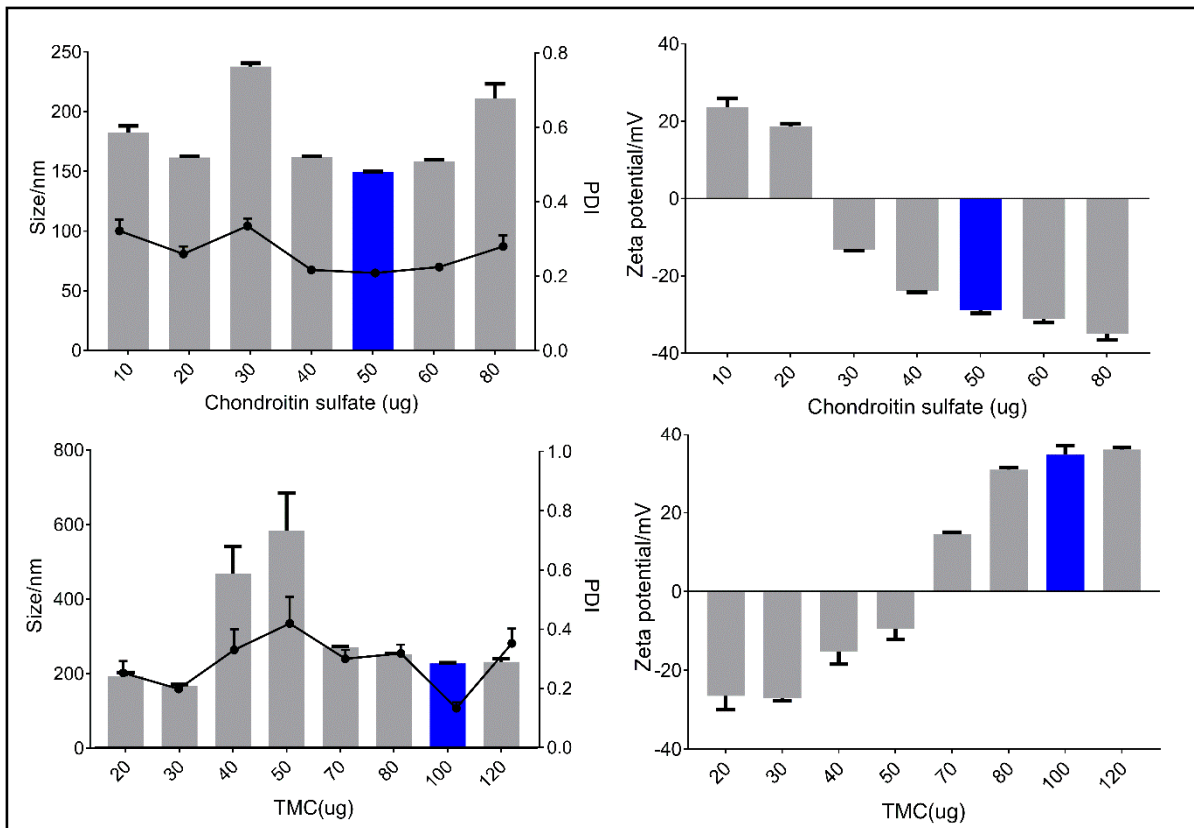

d)

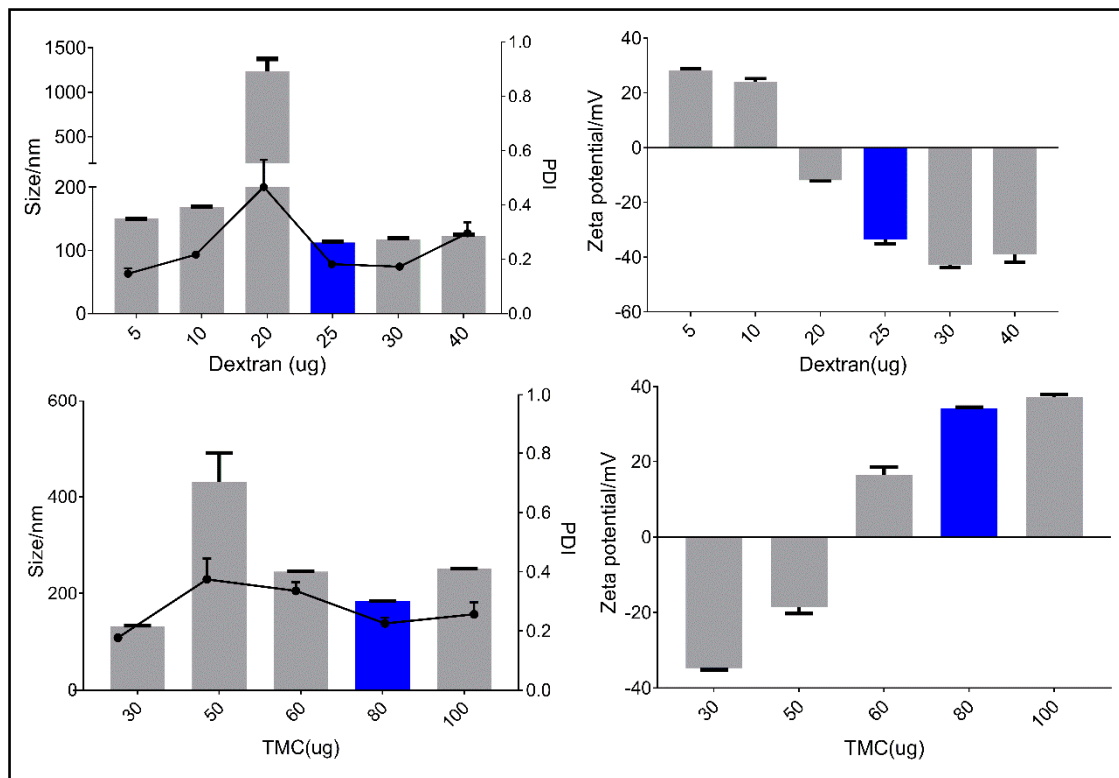

e)

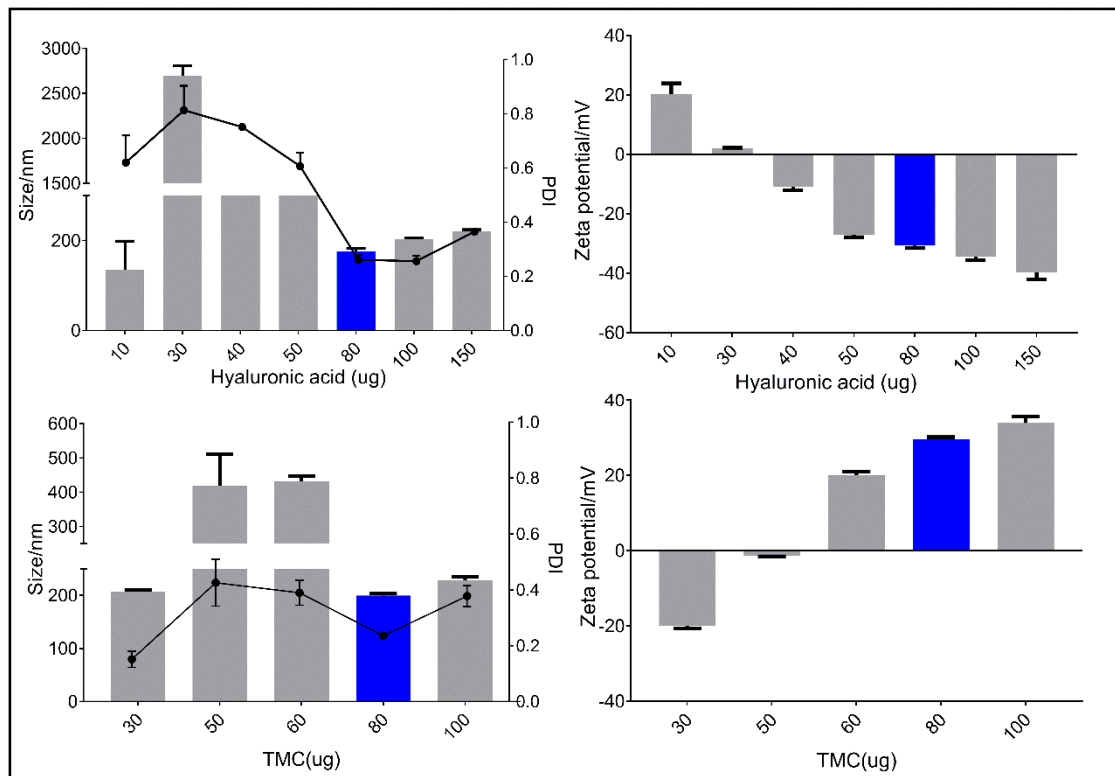

f)

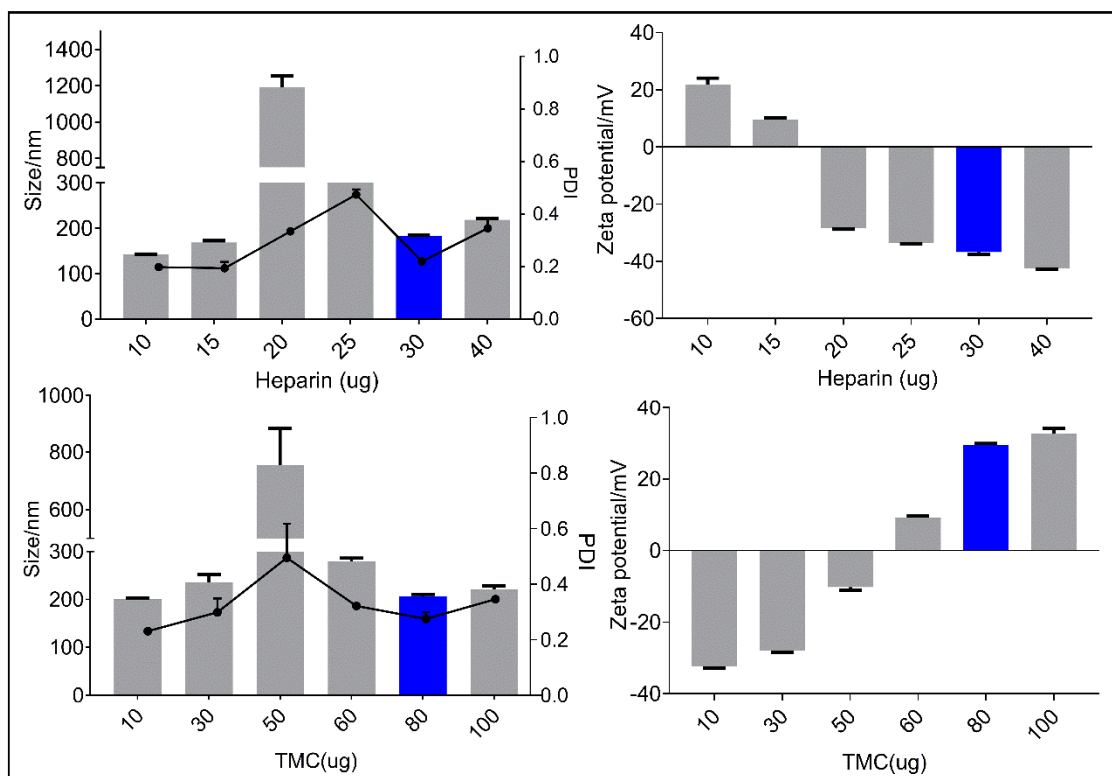

**Figure S3.** The optimization of formulation monitored with DLS. In each panel, the top two graphs represented the optimization of negative polymer mixing ratios (a, Lip-1; b, PEC-1; c, PEC-2; d, PEC-3; e, PEC-4; f, PEC-5) while the bottom two graphs represented the optimization of TMC coating. The optimum amount of each polymer required was marked in blue column.

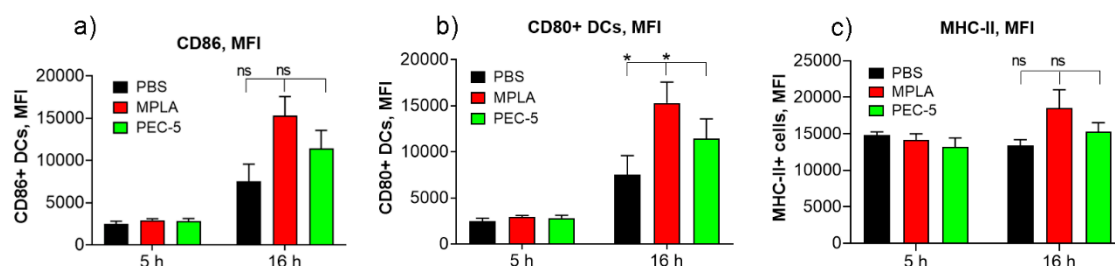

**Figure S4.** PEC-5 induced maturation of splenocyte-derived DCs. DCs were cultured with PEC-5 for 5 h and 16 h separately. Expression levels of CD 86 (a), CD 80 (b) and MHC-II (c) were measured by flow cytometry. Results are mean fluorescence intensity (MFI)  $\pm$  SEM (n= 2). \*  $p<0.05$ , \*\*  $p<0.01$  and \*\*\*  $p<0.001$ .

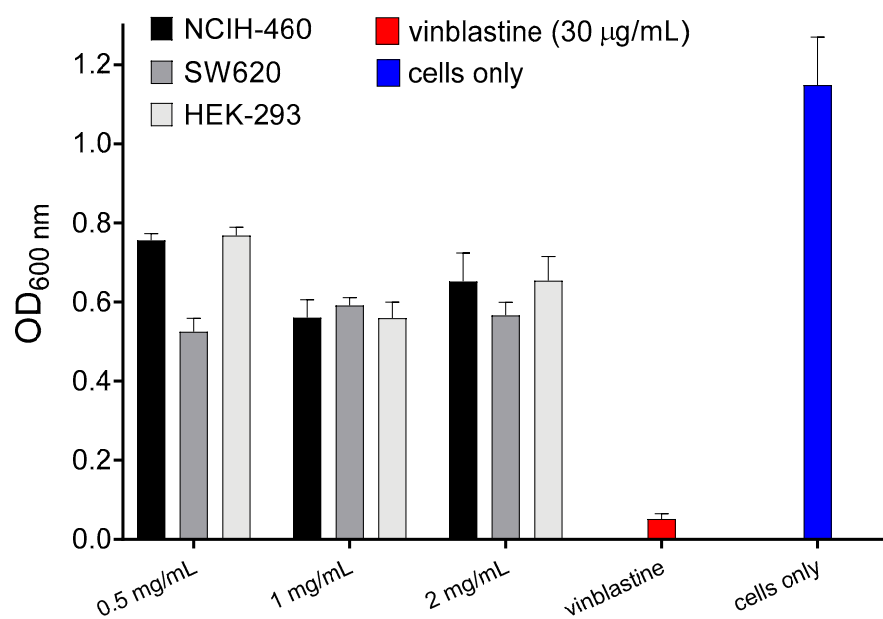

**Figure S5.** The viability of cells treated with PEC-5. NCIH-460: human lung cancer cell line, SW620: human colorectal cancer cell line, HEK293: human kidney cell line. After 68 h incubation, cell viability was measured with MTT assay. All values are reported as means  $\pm$  SEM with duplicate data points.
